# Supplementary material for: Degradation of polymers by fungi isolated from dumpsites
Source: Research Square preprint supplement (doi:10.21203/rs.3.rs-860226/v2), 2022-05-10
Supplement: Supplementary file 1 [file aa542240ed3ffb9c251bdb88.docx]

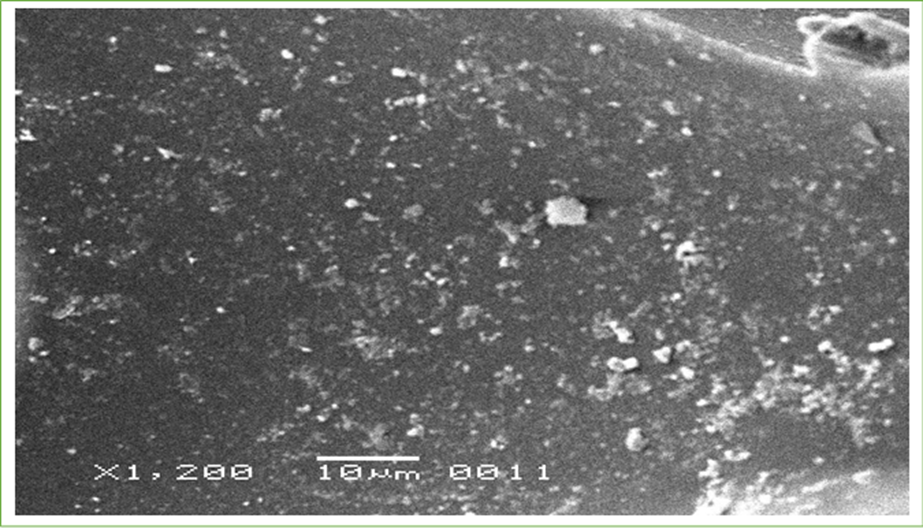


Image 1: Untreated surface of polyurethane


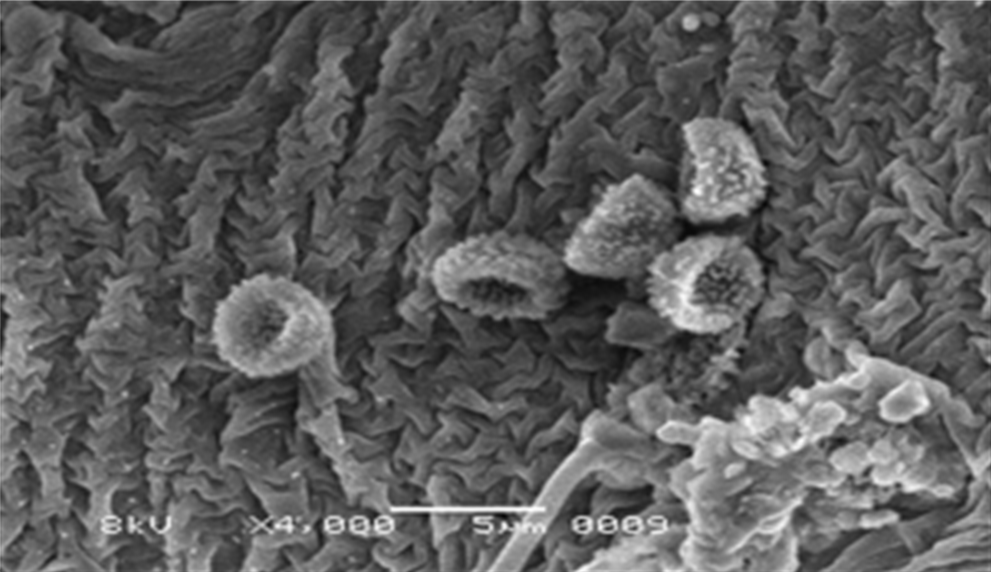


Image 2: *Aspergillus flavus* treated surface of polystyrene


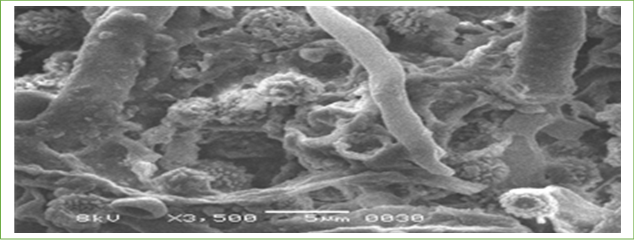


Image 3: *Aspergillus flavus* treated surface of polyurethane
